# Supplementary material for: Health-Related Factors in Rural and Urban Mexican Adolescents from the State of Jalisco: The HELENA-MEX Study
Source: PubMed Central journal article supplement (PMC7729600; doi:10.3390/ijerph17238959), 2020-12-02
Supplement: ijerph-17-08959-s001.pdf [file ijerph-17-08959-s001.pdf]

**Table S1.** Descriptive statistics and results ANCOVAs in rural and urban adolescents by sex.

|                                 | Male  |                 |       |                 | Female |                 |       |                 |
|---------------------------------|-------|-----------------|-------|-----------------|--------|-----------------|-------|-----------------|
|                                 | Rural |                 | Urban |                 | Rural  |                 | Urban |                 |
|                                 | n     | M ± SD          | n     | M ± SD          | n      | M ± SD          | n     | M ± SD          |
| <b>Anthropometry and BC</b>     |       |                 |       |                 |        |                 |       |                 |
| Height (cm)                     | 78    | 167.98 ± 0.85   | 130   | 168.14 ± 0.66   | 133    | 162.42 ± 0.47   | 128   | 157.92 ± 0.51   |
| Weight (kg)                     | 78    | 64.20 ± 1.73    | 123   | 60.92 ± 1.37    | 132    | 56.55 ± 0.96    | 126   | 55.37 ± 0.98    |
| BMI for age (z-score)           | 77    | 0.67 ± 0.16*    | 122   | 0.23 ± 0.12*    | 132    | 0.56 ± 0.10*    | 125   | 0.21 ± 0.10*    |
| WHR                             | 78    | 0.84 ± 0.01     | 130   | 0.83 ± 0.00     | 132    | 0.79 ± 0.00*    | 126   | 0.77 ± 0.00*    |
| Fat mass (%)                    | 78    | 20.61 ± 0.99    | 122   | 19.42 ± 0.79    | 131    | 32.46 ± 0.67    | 126   | 30.88 ± 0.68    |
| FMI (FM/height <sup>2</sup> )   | 78    | 4.92 ± 0.34     | 122   | 4.51 ± 0.27     | 131    | 7.62 ± 0.27     | 126   | 7.05 ± 0.27     |
| FMI arms                        | 78    | 0.60 ± 0.05     | 119   | 0.53 ± 0.04     | 131    | 1.11 ± 0.04     | 123   | 1.00 ± 0.05     |
| FMI trunk                       | 78    | 2.45 ± 0.19     | 122   | 2.15 ± 0.15     | 131    | 3.84 ± 0.14*    | 126   | 3.42 ± 0.15*    |
| FMI legs                        | 78    | 1.48 ± 0.09     | 122   | 1.41 ± 0.07     | 131    | 2.25 ± 0.07     | 126   | 2.18 ± 0.07     |
| Fat Free Mass (%)               | 78    | 79.39 ± 0.99    | 122   | 80.58 ± 0.79    | 131    | 67.54 ± 0.67    | 126   | 69.12 ± 0.68    |
| FMI (FFM/height <sup>2</sup> )  | 78    | 17.68 ± 0.25*   | 122   | 16.90 ± 0.20*   | 131    | 14.98 ± 0.13    | 126   | 14.73 ± 0.13    |
| FFMI arms                       | 78    | 1.89 ± 0.04*    | 122   | 1.71 ± 0.03*    | 131    | 1.45 ± 0.02*    | 126   | 1.34 ± 0.02*    |
| FFMI trunk                      | 78    | 7.89 ± 0.12*    | 122   | 7.38 ± 0.09*    | 131    | 6.87 ± 0.07*    | 126   | 6.53 ± 0.07*    |
| FFMI legs                       | 78    | 1.48 ± 0.09     | 122   | 1.41 ± 0.07     | 131    | 2.25 ± 0.07     | 126   | 2.18 ± 0.07     |
| <b>Physical Fitness</b>         |       |                 |       |                 |        |                 |       |                 |
| Handgrip (kg) <sup>1</sup>      | 74    | 34.44 ± 0.85*   | 120   | 30.63 ± 0.67*   | 130    | 24.15 ± 0.38*   | 107   | 22.73 ± 0.42*   |
| Standing longjump (cm)          | 77    | 164.31 ± 3.36   | 120   | 169.91 ± 2.69   | 130    | 126.60 ± 1.72   | 107   | 126.98 ± 1.90   |
| SJ (cm)                         | 77    | 23.48 ± 0.69*   | 119   | 25.85 ± 0.56*   | 130    | 17.69 ± 0.36    | 108   | 18.34 ± 0.40    |
| CMJ (cm)                        | 77    | 25.34 ± 0.66    | 119   | 24.63 ± 0.53    | 130    | 18.79 ± 0.38    | 108   | 18.73 ± 0.42    |
| ABA (cm)                        | 77    | 29.32 ± 0.80*   | 120   | 31.78 ± 0.64*   | 131    | 21.65 ± 0.43    | 108   | 22.52 ± 0.48    |
| VO <sub>2</sub> max (ml/kg/min) | 76    | 34.36 ± 0.92    | 92    | 35.17 ± 0.83    | 128    | 26.30 ± 0.29    | 93    | 26.32 ± 0.34    |
| 4x10m shuttle run test (sec)    | 76    | 12.46 ± 0.14*   | 120   | 11.65 ± 0.11*   | 131    | 15.12 ± 0.11*   | 107   | 13.67 ± 0.12*   |
| BSSR (cm) <sup>1</sup>          | 77    | 21.19 ± 0.86*   | 120   | 24.56 ± 0.71*   | 131    | 25.43 ± 0.59*   | 108   | 30.20 ± 0.66*   |
| <b>Physical Activity</b>        |       |                 |       |                 |        |                 |       |                 |
| SED (%)                         | 52    | 62.51 ± 1.03*   | 43    | 69.67 ± 1.13*   | 107    | 71.81 ± 0.56*   | 38    | 74.84 ± 0.94*   |
| Light PA (%)                    | 52    | 24.52 ± 0.68*   | 43    | 20.50 ± 0.75*   | 107    | 19.59 ± 0.38*   | 38    | 17.98 ± 0.65*   |
| Moderate PA (%)                 | 52    | 7.05 ± 0.31*    | 43    | 5.60 ± 3.43*    | 107    | 5.37 ± 0.17*    | 38    | 4.59 ± 2.85*    |
| Vigorous PA (%)                 | 52    | 5.90 ± 0.33*    | 43    | 4.23 ± 0.36*    | 107    | 3.23 ± 0.16*    | 38    | 2.59 ± 0.26*    |
| MVPA (%)                        | 52    | 12.95 ± 0.55*   | 43    | 9.83 ± 0.60*    | 107    | 8.60 ± 0.27*    | 38    | 7.18 ± 0.46*    |
| MVPA (min/day)                  | 52    | 97.90 ± 4.35*   | 43    | 75.41 ± 4.78*   | 107    | 63.97 ± 2.19*   | 38    | 55.04 ± 3.69*   |
| <b>Dietary Intake</b>           |       |                 |       |                 |        |                 |       |                 |
| Carbohydrates (gr)              | 76    | 285.96 ± 11.52  | 115   | 286.88 ± 9.36   | 129    | 249.22 ± 8.00   | 112   | 247.24 ± 8.60   |
| Lipids (gr)                     | 76    | 78.17 ± 4.11    | 117   | 73.05 ± 3.31    | 129    | 64.14 ± 2.81    | 112   | 62.09 ± 3.02    |
| Saturated fatty acids (gr)      | 76    | 25.08 ± 1.45    | 117   | 27.02 ± 1.16    | 129    | 19.91 ± 1.01    | 112   | 21.93 ± 1.09    |
| Proteins (gr)                   | 74    | 90.96 ± 4.35    | 116   | 88.37 ± 3.47    | 126    | 72.63 ± 2.62    | 110   | 75.59 ± 2.81    |
| Caloric intake (kcal/day)       | 76    | 2187.47 ± 83.09 | 115   | 2132.61 ± 67.49 | 129    | 1829.33 ± 54.85 | 112   | 1818.38 ± 58.99 |
| <b>Caloric Expenditure</b>      |       |                 |       |                 |        |                 |       |                 |
| BMR(kcal/day)                   | 78    | 1459.12 ± 21.21 | 122   | 1407.67 ± 16.95 | 131    | 1182.48 ± 9.24  | 126   | 1178.70 ± 9.43  |

|                     |    |                     |    |                     |     |                    |    |                    |
|---------------------|----|---------------------|----|---------------------|-----|--------------------|----|--------------------|
| PA (kcal/day)       | 52 | 543.59 ±<br>32.01*  | 43 | 389.50 ±<br>35.21*  | 107 | 307.84 ±<br>14.08* | 38 | 241.68 ±<br>23.70* |
| BMR + PA (kcal/day) | 52 | 2006.35 ±<br>56.70* | 42 | 1786.87 ±<br>63.12* | 107 | 1483.80 ±<br>21.84 | 38 | 1404.23 ±<br>36.77 |

Note: BC = Body composition; BMI = Body Mass Index; WHR = Waist-Hip Ratio; FMI = Fat Mass Index; FFMI = Fat Free Mass Index; SJ = Squat Jump; CMJ = Counter Movement Jump; ABA = Abalakov Jump; VO<sub>2</sub>max = maximal oxygen consumption; BSSR = Back-saber sit and reach; SED = Sedentary; PA = Physical Activity; MVPA = Moderate-to-Vigorous PA; BMR = Basal Metabolic Rate. <sup>1</sup>Handgrip and BSSR are expressed as mean of right and left side. \*Significant differences between rural vs. urban areas (p<0.05).
